# Supplementary material for: Tunable Stochastic Pulsing in the Escherichia coli Multiple Antibiotic Resistance Network from Interlinked Positive and Negative Feedback Loops
Source: PLOS journal article supplement (doi:10.1371/journal.pcbi.1003229), 2013-09-26
Supplement: S8 (10.1371/journal.pcbi.1003229.s008) [file journal.pcbi.1003229.s008]

**Table S1: Model parameters**

|          |                                               | Value                                                            | Reaction                                                                                                                                                                                    | Propensity                                                                                                                                                          | References and Comments                                                                                                                                                                                                                                             |
|----------|-----------------------------------------------|------------------------------------------------------------------|---------------------------------------------------------------------------------------------------------------------------------------------------------------------------------------------|---------------------------------------------------------------------------------------------------------------------------------------------------------------------|---------------------------------------------------------------------------------------------------------------------------------------------------------------------------------------------------------------------------------------------------------------------|
| $k_{-a}$ | MarA-promoter dissociation rate               | $1.8 (\text{min})^{-1}$                                          | $P_{10} \xrightarrow{k_{-a}} P_{00} + A$ $P_{11} \xrightarrow{k_{-a}} P_{01} + A$ $P_{12} \xrightarrow{k_{-a}} P_{02} + A$                                                                  | $k_{-a} \cdot P_{10}$ $k_{-a} \cdot P_{11}$ $k_{-a} \cdot P_{12}$                                                                                                   | <p>Other feedback operons: <math>1.8 \text{ min}^{-1}</math> [1], <math>2.4 \text{ min}^{-1}</math> [2].</p> <p>The stochastic pulsing is not disrupted for a wide range of <math>k_{-a}</math> and <math>k_{-r}</math> values.</p>                                 |
| $k_a$    | MarA-promoter association rate                | $\frac{k_{-a}}{1500}$ $(\text{molecules} \cdot \text{min})^{-1}$ | $P_{00} + A \xrightarrow{k_a} P_{10}$ $P_{01} + A \xrightarrow{k_a/\beta} P_{11}$ $P_{02} + A \xrightarrow{k_a/\beta'} P_{12}$                                                              | $\frac{1}{V} \cdot k_a \cdot P_{00} \cdot A$ $\frac{1}{V} \cdot \frac{k_a}{\beta} \cdot P_{01} \cdot A$ $\frac{1}{V} \cdot \frac{k_a}{\beta'} \cdot P_{02} \cdot A$ | <p>Dissociation constant for MarA = <math>25 \text{ nM} = 1500</math> molecules/cell [3].</p> <p>V is the ratio between the volume of the cell at a given time and the average volume of <i>E. coli</i> considered in the paper (<math>1 \mu\text{m}^3</math>).</p> |
| $k_{-r}$ | MarR <sub>2</sub> -promoter dissociation rate | $1.8 (\text{min})^{-1}$                                          | $P_{01} \xrightarrow{k_{-r}} P_{00} + R_2$ $P_{02} \xrightarrow{2 \cdot k_{-r}} P_{01} + R_2$ $P_{11} \xrightarrow{k_{-r}} P_{10} + R_2$ $P_{12} \xrightarrow{2 \cdot k_{-r}} P_{11} + R_2$ | $k_{-r} \cdot P_{01}$ $2 \cdot k_{-r} \cdot P_{02}$ $k_{-r} \cdot P_{11}$ $2 \cdot k_{-r} \cdot P_{12}$                                                             | <p>Other feedback operons: <math>1.8 \text{ min}^{-1}</math> [1], <math>2.4 \text{ min}^{-1}</math> [2].</p> <p>The stochastic pulsing is not disrupted for a wide range of <math>k_{-a}</math> and <math>k_{-r}</math> values.</p>                                 |
| $k_r$    | MarR <sub>2</sub> -promoter association rate  | $\frac{k_{-r}}{150}$ $(\text{molecules} \cdot \text{min})^{-1}$  | $P_{00} + R_2 \xrightarrow{2 \cdot k_r} P_{01}$ $P_{01} + R_2 \xrightarrow{k_r} P_{02}$                                                                                                     | $\frac{1}{V} \cdot 2 \cdot k_r \cdot P_{00} \cdot R_2$ $\frac{1}{V} \cdot k_r \cdot P_{01} \cdot R_2$                                                               | <p>Dissociation constant for MarR<sub>2</sub> = <math>2.5 \text{ nM} = 150</math> molecules/cell [4-6].</p>                                                                                                                                                         |

|               |                                                                                                     |                                                                              |                                                                                                            |                                                                                                                                      |                                                                                                                                                                                                                                                                                                             |
|---------------|-----------------------------------------------------------------------------------------------------|------------------------------------------------------------------------------|------------------------------------------------------------------------------------------------------------|--------------------------------------------------------------------------------------------------------------------------------------|-------------------------------------------------------------------------------------------------------------------------------------------------------------------------------------------------------------------------------------------------------------------------------------------------------------|
|               |                                                                                                     |                                                                              | $P_{10} + R_2 \xrightarrow{2 \cdot k_r / \alpha} P_{11}$ $P_{11} + R_2 \xrightarrow{k_r / \alpha'} P_{12}$ | $\frac{1}{V} \cdot \frac{2 \cdot k_r}{\alpha} \cdot P_{10} \cdot R_2$ $\frac{1}{V} \cdot \frac{k_r}{\alpha'} \cdot P_{11} \cdot R_2$ |                                                                                                                                                                                                                                                                                                             |
| $\alpha_{00}$ | Transcription rate with no MarR <sub>2</sub> molecules and no MarA molecules bound to the promoter  | $0.40 \text{ (min)}^{-1}$                                                    | $P_{00} \xrightarrow{\alpha_{00}} P_{00} + M + R_{uf} + A_{uf}$                                            | $\alpha_{00} \cdot P_{00}$                                                                                                           | From other systems: $0.36 \text{ min}^{-1}$ [1], $0.1 \text{ min}^{-1}$ [2].<br>$\alpha_{00}$ , $\beta_{(a/r)}$ and $c_{Act}$ are chosen to match the experimental data (10,000 molecules if MarR <sub>2</sub> binding sites are eliminated, 500 molecules in the basal level – See Supplementary Methods). |
| $\alpha_{01}$ | Transcription rate with one MarR <sub>2</sub> molecule and no MarA molecules bound to the promoter  | $\alpha_{00} / c_{Inh1} \text{ (min)}^{-1}$                                  | $P_{01} \xrightarrow{\alpha_{01}} P_{01} + M + R_{uf} + A_{uf}$                                            | $\alpha_{01} \cdot P_{01}$                                                                                                           | One molecule of MarR <sub>2</sub> is bound; the transcription rate is modified by $c_{Inh1}$ .                                                                                                                                                                                                              |
| $\alpha_{10}$ | Transcription rate with no MarR <sub>2</sub> molecules and one MarA molecule bound to the promoter  | $\alpha_{00} \times c_{Act} \text{ (min)}^{-1}$                              | $P_{10} \xrightarrow{\alpha_{10}} P_{10} + M + R_{uf} + A_{uf}$                                            | $\alpha_{10} \cdot P_{10}$                                                                                                           | One molecule of MarA is bound; the transcription rate is modified by $c_{Act}$ .                                                                                                                                                                                                                            |
| $\alpha_{11}$ | Transcription rate with one MarR <sub>2</sub> molecule and one MarA molecule bound to the promoter  | $\alpha_{00} \times c_{Act} / c_{Inh1} \text{ (min)}^{-1}$                   | $P_{11} \xrightarrow{\alpha_{11}} P_{11} + M + R_{uf} + A_{uf}$                                            | $\alpha_{11} \cdot P_{11}$                                                                                                           | One molecule of MarA and one molecule of MarR <sub>2</sub> are bound; the transcription rate is modified by $c_{Act} / c_{Inh1}$ .                                                                                                                                                                          |
| $\alpha_{12}$ | Transcription rate with two MarR <sub>2</sub> molecules and one MarA molecule bound to the promoter | $\alpha_{00} \times c_{Act} / (c_{Inh1} \times c_{Inh2}) \text{ (min)}^{-1}$ | $P_{12} \xrightarrow{\alpha_{12}} P_{12} + M + R_{uf} + A_{uf}$                                            | $\alpha_{12} \cdot P_{12}$                                                                                                           | One molecule of MarA and two molecules of MarR <sub>2</sub> are bound; the transcription rate is modified by $c_{Act} / (c_{Inh1} \times c_{Inh2})$ .                                                                                                                                                       |

|                   |                                                                                                     |                                                                          |                                                                 |                            |                                                                                                                                                                                                                                                                                                                                             |
|-------------------|-----------------------------------------------------------------------------------------------------|--------------------------------------------------------------------------|-----------------------------------------------------------------|----------------------------|---------------------------------------------------------------------------------------------------------------------------------------------------------------------------------------------------------------------------------------------------------------------------------------------------------------------------------------------|
| $\alpha_{02}$     | Transcription rate with two MarR <sub>2</sub> molecules and no MarA molecules bound to the promoter | $\alpha_{00}/(c_{\text{Inh1}} \times c_{\text{Inh2}}) (\text{min})^{-1}$ | $P_{02} \xrightarrow{\alpha_{02}} P_{02} + M + R_{uf} + A_{uf}$ | $\alpha_{02} \cdot P_{02}$ | Two molecules of MarR <sub>2</sub> are bound; the transcription rate is modified by $1 / (c_{\text{Inh1}} \times c_{\text{Inh2}})$ .                                                                                                                                                                                                        |
| $c_{\text{Act}}$  | Activation factor                                                                                   | 80                                                                       |                                                                 |                            | From another system: 20 [1].<br><br><i>marRAB</i> is expressed strongly after induction [7]. $\alpha_{00}$ , $\beta_{(a/r)}$ and $c_{\text{Act}}$ are chosen to match experimental data from this study (10,000 molecules if MarR <sub>2</sub> binding sites are eliminated, 500 molecules in the basal level – See Supplementary Methods). |
| $c_{\text{Inh1}}$ | Repression factor for the first MarR <sub>2</sub> binding                                           | 800                                                                      |                                                                 |                            | MarR <sub>2</sub> binding impairs RNA polymerase binding and progression [5,8]. The system is robust to changes in this parameter.                                                                                                                                                                                                          |
| $c_{\text{Inh2}}$ | Repression factor for the second MarR <sub>2</sub> binding                                          | 10                                                                       |                                                                 |                            | MarR <sub>2</sub> binding impairs RNA polymerase binding and progression [5,8]. The system is robust to changes in this parameter.                                                                                                                                                                                                          |
| $\lambda_M$       | mRNA degradation rate                                                                               | $\ln(2) / 24 (\text{min})^{-1}$                                          | $M \xrightarrow{\lambda_M} 0$                                   | $\lambda_M \cdot M$        | [9], Stochastic pulsing behavior is robust to changes in this parameter.                                                                                                                                                                                                                                                                    |
| $\beta_a$         | <i>marA</i> translation rate                                                                        | $0.34 \times 20 (\text{min})^{-1}$                                       | $M \xrightarrow{\beta_a} M + A_{uf}$                            | $\beta_a \cdot M$          | Translation rate = 34% of the <i>lacZ</i> translation rate [7].<br><br><i>lacZ</i> translation rate: 18.8 min <sup>-1</sup> [10], <i>lacZ</i> initialization every 3.2 sec [11].                                                                                                                                                            |
| $\beta_r$         | <i>marR</i> translation rate                                                                        | $0.044 \times 20 (\text{min})^{-1}$                                      | $M \xrightarrow{\beta_r} M + R_{uf}$                            | $\beta_r \cdot M$          | Translation rate = 4.4% of the <i>lacZ</i> translation rate. [7].                                                                                                                                                                                                                                                                           |
| $k_{fa}$          | MarA folding rate                                                                                   | $5 (\text{min})^{-1}$                                                    | $A_{uf} \xrightarrow{k_{fa}} A$                                 | $k_{fa} \cdot A_{uf}$      | Fast, due to the small size of the protein and the coupling of this process with translation <i>in vivo</i> [12]. The system is robust to changes in this value.                                                                                                                                                                            |

|                 |                                         |                                                 |                                        |                                                          |                                                                                                                                                                                                                                                                                                                                                       |
|-----------------|-----------------------------------------|-------------------------------------------------|----------------------------------------|----------------------------------------------------------|-------------------------------------------------------------------------------------------------------------------------------------------------------------------------------------------------------------------------------------------------------------------------------------------------------------------------------------------------------|
|                 |                                         |                                                 |                                        |                                                          | Other examples: $60 \text{ min}^{-1}$ for Cytochrome C [13], $0.9 \text{ min}^{-1}$ for the synthetic oscillator [1].                                                                                                                                                                                                                                 |
| $k_{fr}$        | MarR folding rate                       | $5 (\text{min})^{-1}$                           | $R_{uf} \xrightarrow{k_{fr}} R$        | $k_{fr} \cdot R_{uf}$                                    | Fast, due to the small size of the protein and the coupling of this process with translation <i>in vivo</i> [12].<br>The system is robust to variations in this value.<br><br>Other examples: $60 \text{ min}^{-1}$ for Cytochrome C [13], $0.9 \text{ min}^{-1}$ for the synthetic oscillator [1].                                                   |
| $k_{dr}$        | MarR dimerization rate                  | $0.01 (\text{molecules} \cdot \text{min})^{-1}$ | $2 \times R \xrightarrow{k_{dr}} R_2$  | $\frac{1}{V} \cdot k_{dr} \cdot \frac{R \cdot (R-1)}{2}$ | Assumed to be consistent with the cI protein in <i>E. coli</i> , $0.01 \text{ mol}^{-1} \text{ min}^{-1}$ [14]. The system is robust to variations in this value.<br><br>Another example: $0.18 \text{ min}^{-1}$ for the synthetic oscillator [1].                                                                                                   |
| $k_{-dr}$       | MarR <sub>2</sub> dimer disruption rate | $k_{dr}/50 (\text{min})^{-1}$                   | $R_2 \xrightarrow{k_{-dr}} 2 \times R$ | $k_{-dr} \cdot R_2$                                      | Assumed to be consistent with the cI protein in <i>E. coli</i> , $k_{dr}/50 \text{ min}^{-1}$ . The system is robust to variations in this value.<br><br>Other example: $k_{dr}/100 \text{ min}^{-1}$ for the synthetic oscillator [1].                                                                                                               |
| $\lambda_{auf}$ | Unfolded MarA degradation rate          | $\lambda_r (\text{min})^{-1}$                   | $A_{uf} \xrightarrow{\lambda_{auf}} 0$ | $\lambda_{auf} \cdot A_{uf}$                             | We assumed only folded MarA to be actively degraded by Lon protease [15], setting the degradation rate for unfolded MarA at a reduced level, comparable to what we used for degradation of the folded MarR <sub>2</sub> protein. There is only a small amount of unfolded protein; as a result, the system is robust to variations in this parameter. |
| $\lambda_a$     | MarA degradation                        | $\ln(2) (\text{min})^{-1}$                      | $A \xrightarrow{\lambda_a} 0$          | $\lambda_a \cdot A$                                      | [15]                                                                                                                                                                                                                                                                                                                                                  |
| $\lambda_{ruf}$ | Unfolded MarR degradation rate          | $\lambda_r (\text{min})^{-1}$                   | $R_{uf} \xrightarrow{\lambda_{ruf}} 0$ | $\lambda_{ruf} \cdot R_{uf}$                             | We assumed the same degradation rate as the folded MarR <sub>2</sub> protein. There is only a small amount of unfolded protein; as a result, the system is robust to variations in this parameter.                                                                                                                                                    |

|             |                                                                                                                   |                                                                                                                                                                                                                                                                                                                                                                                                                                                                                                                                                                                                                                                                  |                                                               |                                                    |                                                                                                                                                                                                    |
|-------------|-------------------------------------------------------------------------------------------------------------------|------------------------------------------------------------------------------------------------------------------------------------------------------------------------------------------------------------------------------------------------------------------------------------------------------------------------------------------------------------------------------------------------------------------------------------------------------------------------------------------------------------------------------------------------------------------------------------------------------------------------------------------------------------------|---------------------------------------------------------------|----------------------------------------------------|----------------------------------------------------------------------------------------------------------------------------------------------------------------------------------------------------|
| $\lambda_r$ | MarR and MarR <sub>2</sub> degradation                                                                            | $\ln(2) / 24 \text{ (min)}^{-1}$                                                                                                                                                                                                                                                                                                                                                                                                                                                                                                                                                                                                                                 | $R \xrightarrow{\lambda_r} 0$ $R_2 \xrightarrow{\lambda_r} 0$ | $\lambda_r \cdot R$ $\lambda_r \cdot R_2$          | We assumed the protein to be stable, using a degradation time that matches the dilution rate due to cell division in rich medium [16]. Changes in the parameter do not disrupt stochastic pulsing. |
| $k_{sal}$   | MarR <sub>2</sub> allosteric inhibition rate                                                                      | 20<br>$\text{(molecules} \cdot \text{min)}^{-1}$                                                                                                                                                                                                                                                                                                                                                                                                                                                                                                                                                                                                                 | $Sal + MarR_2 \xrightarrow{k_{Sal}} MarR_2 - Sal$             | $\frac{1}{V} \cdot k_{Sal} \cdot MarR_2 \cdot Sal$ | Selected to fit experimental data from [17] and [18]. The system is robust to changes in this parameter.                                                                                           |
| $k_{-sal}$  | MarR <sub>2</sub> -Salicylate complex disruption rate                                                             | 0.5<br>$\text{(min)}^{-1}$                                                                                                                                                                                                                                                                                                                                                                                                                                                                                                                                                                                                                                       | $MarR_2 - Sal \xrightarrow{k_{-Sal}} Sal + MarR_2$            | $k_{-Sal} \cdot MarR_2 - Sal$                      | Selected to fit experimental data from [17] and [18]. The system is robust to changes in this parameter.                                                                                           |
|             |                                                                                                                   | As detailed in Supplementary Methods, the parameters given below are used to fit the model to the following experimental data: 3.3-fold repression with only one MarR <sub>2</sub> site active and a 20-fold repression with both sites active [7,19]; competition in the binding between MarA and MarR <sub>2</sub> [5], either by sliding block [20] or alignment of the marbox with the -35 box [8]; approximately 9,000 molecules with 5mM of salicylate induction [4] and maximum expression with salicylate of 10,000 molecules ([17] with the data from [4]); basal expression of 500 molecules (Maximum level / Repression fold with both sites active). |                                                               |                                                    |                                                                                                                                                                                                    |
| $\alpha$    | Inhibition in the binding of the first molecule of MarR <sub>2</sub> when MarA and no MarR <sub>2</sub> are bound | 1000                                                                                                                                                                                                                                                                                                                                                                                                                                                                                                                                                                                                                                                             | $P_{10} + R_2 \xrightarrow{2 \cdot k_r / \alpha} P_{11}$      |                                                    |                                                                                                                                                                                                    |
| $\alpha'$   | Inhibition in the binding of the second molecule of MarR <sub>2</sub> when MarA and MarR <sub>2</sub> are bound   | 1.5                                                                                                                                                                                                                                                                                                                                                                                                                                                                                                                                                                                                                                                              | $P_{11} + R_2 \xrightarrow{k_r / \alpha'} P_{12}$             |                                                    |                                                                                                                                                                                                    |
| $\beta$     | Inhibition in the binding of MarA when one MarR <sub>2</sub> molecule is bound                                    | 1.5                                                                                                                                                                                                                                                                                                                                                                                                                                                                                                                                                                                                                                                              | $P_{01} + A \xrightarrow{k_a / \beta} P_{11}$                 |                                                    |                                                                                                                                                                                                    |

|          |                                                                                  |     |                                              |  |  |
|----------|----------------------------------------------------------------------------------|-----|----------------------------------------------|--|--|
| $\beta'$ | Inhibition in the binding of MarA when two MarR <sub>2</sub> molecules are bound | 1.5 | $P_{02} + A \xrightarrow{k_a/\beta'} P_{12}$ |  |  |
|----------|----------------------------------------------------------------------------------|-----|----------------------------------------------|--|--|

## References

1. Stricker J, Cookson S, Bennett MR, Mather WH, Tsimring LS, et al. (2008) A fast, robust and tunable synthetic gene oscillator. *Nature* 456: 516-519.
2. Stamatakis M, Zygorakis K (2011) Deterministic and stochastic population-level simulations of an artificial lac operon genetic network. *BMC bioinformatics* 12: 301.
3. Martin RG, Rosner JL (2011) Promoter discrimination at class I MarA regulon promoters mediated by glutamic acid 89 of the MarA transcriptional activator of *Escherichia coli*. *Journal of bacteriology* 193: 506-515.
4. Martin RG, Bartlett ES, Rosner JL, Wall ME (2008) Activation of the *Escherichia coli* marA/soxS/rob regulon in response to transcriptional activator concentration. *Journal of molecular biology* 380: 278-284.
5. Martin RG, Jair K-W, Wolf RE, Rosner JL (1996) Autoactivation of the marRAB Multiple Antibiotic Resistance Operon by the MarA transcriptional activator in *Escherichia coli*. *Journal of bacteriology* 178: 2216-2223.
6. Alekshun MN, Levy SB (1999) The mar regulon: multiple resistance to antibiotics and other toxic chemicals. *Trends in microbiology* 7: 410-413.
7. Martin RG, Rosner JL (2004) Transcriptional and translational regulation of the marRAB multiple antibiotic resistance operon in *Escherichia coli*. *Molecular microbiology* 53: 183-191.
8. Martin RG, Rosner JL (1997) Fis, an accessory factor for transcriptional activation of the mar (multiple antibiotic resistance) promoter of *Escherichia coli* in the presence of the activator MarA, SoxS, or Rob. *Journal of bacteriology* 179: 7410-7419.
9. Selinger DW, Saxena RM, Cheung KJ, Church GM, Rosenow C (2003) Global RNA Half-Life Analysis in *Escherichia coli* Reveals Positional Patterns of Transcript Degradation. *Genome research*: 216-223.
10. Santillán M, Mackey MC, Zeron ES (2007) Origin of bistability in the lac Operon. *Biophysical journal* 92: 3830-3842.
11. Kennell D, Riezman H (1977) Transcription and translation initiation frequencies of the *Escherichia coli* lac operon. *Journal of molecular biology* 114: 1-21.
12. Alberts B, Johnson A, Lewis J, Raff M, Roberts K, et al. (2002) *How Cells Read the Genome: From DNA to Protein*. *Molecular Biology of the Cell*. 4th ed. New York: Garland Science.
13. Krishna MMG, Lin Y, Mayne L, Walter Englander S (2003) Intimate View of a Kinetic Protein Folding Intermediate: Residue-resolving and Unfolding Rates, Homogeneity of Structure, Interactions, Stability, F. *Journal of Molecular Biology* 334: 501-513.
14. Bundschuh R, Hayot F, Jayaprakash C (2003) The role of dimerization in noise reduction of simple genetic networks. *Journal of theoretical biology* 220: 261-269.
15. Griffith KL, Shah IM, E. Wolf R (2004) Proteolytic degradation of *Escherichia coli* transcription activators SoxS and MarA as the mechanism for reversing the induction of the superoxide (SoxRS) and multiple antibiotic resistance (Mar) regulons. *Molecular Microbiology* 51: 1801-1816.
16. Sezonov G, Joseleau-Petit D, D'Ari R (2007) *Escherichia coli* physiology in Luria-Bertani broth. *Journal of bacteriology* 189: 8746-8749.
17. Wood KB, Cluzel P (2012) Trade-offs between drug toxicity and benefit in the multi-antibiotic resistance system underlie optimal growth of *E. coli*. *BMC systems biology* 6: 48.
18. Cohen SP, Levy SB, Foulds J, Rosner JL (1993) Salicylate induction of antibiotic resistance in *Escherichia coli*: activation of the mar operon and a mar-independent pathway. *Journal of bacteriology* 175: 7856-7862.
19. Seoane AS, Levy SB (1995) Characterization of MarR, the repressor of the multiple antibiotic resistance (mar) operon in *Escherichia coli*. *Journal of bacteriology* 177: 3414-3419.
20. Hammar P, Leroy P, Mahmutovic A, Marklund EG, Berg OG, et al. (2012) The lac Repressor Displays Facilitated. *Science* 315: 1595-1598.
